# Supplementary material
Source: MDPI journal article supplement (https://www.mdpi.com/2071-1050/13/14/8056)
Supplement: s1 [file s1]

## Questionnaires for Research (Study)

**Table S1.** Survey Questions in Study

| Factor                                                        | Question                                                                                                                      | Code |
|---------------------------------------------------------------|-------------------------------------------------------------------------------------------------------------------------------|------|
| COVID-19-related factor (C)                                   | I would travel abroad if a COVID-19 vaccine is developed.                                                                     | C-1  |
|                                                               | I would travel abroad if a cure for COVID-19 is developed.                                                                    | C-2  |
|                                                               | If the number of new confirmed COVID-19 cases in my destination country begins to decline, I would travel abroad.             | C-3  |
|                                                               | I would travel abroad if the number of new confirmed COVID-19 cases per day falls below 100 in my destination country.        | C-4  |
|                                                               | I would travel abroad if the number of new confirmed COVID-19 cases per day falls below 50 in my destination country.         | C-5  |
|                                                               | I would travel abroad if the number of new confirmed COVID-19 cases per day falls below 10 in my destination country.         | C-6  |
|                                                               | I would travel abroad if COVID-19 does not begin to spread again in my destination country.                                   | C-7  |
|                                                               | I would travel abroad if my destination country declares itself COVID-19-free (zero new confirmed case).                      | C-8  |
|                                                               | I would travel abroad if my destination country does not impose entry restrictions.                                           | C-9  |
|                                                               | I will definitely travel abroad if the circumstances allow me to do so, regardless of the COVID-19 situation.                 | C-10 |
| Factor related to self-isolation upon entry and departure (Q) | I would travel abroad if there were no entry restrictions, even if I have to self-isolate (currently 14 days) upon arrival.   | Q-1  |
|                                                               | I would travel abroad if the self-isolation period was reduced to 2 weeks or less (currently 14 days) upon arrival.           | Q-2  |
|                                                               | I would travel abroad if the self-isolation period was reduced to 1 week or less (currently 14 days) upon arrival.            | Q-3  |
|                                                               | I would travel abroad if self-isolation was no longer required.                                                               | Q-4  |
|                                                               | I will definitely travel abroad if the circumstances allow me to do so, regardless of self-isolation.                         | Q-5  |
| Destination-related factor (D)                                | I would travel abroad if the sanitary conditions of tourist attractions in my destination country were good.                  | D-1  |
|                                                               | I would travel abroad if the sanitary conditions of accommodation facilities in my destination country were good.             | D-2  |
|                                                               | I would travel abroad if the sanitary conditions of restaurants in my destination country were good.                          | D-3  |
|                                                               | I would travel abroad if the sanitary conditions of public transportation in my destination country were good.                | D-4  |
|                                                               | I would travel abroad if the climate in my destination country was hot.                                                       | D-5  |
|                                                               | I would travel abroad if the climate in my destination country was cold.                                                      | D-6  |
|                                                               | I would travel abroad if it is convenient to use the medical facilities (hospitals and pharmacies) in my destination country. | D-7  |

|                                                                         |                                                                                                                                                                                 |      |
|-------------------------------------------------------------------------|---------------------------------------------------------------------------------------------------------------------------------------------------------------------------------|------|
|                                                                         | I would travel abroad if my destination country has few international tourists (or if my destination country restricts the number of tourists allowed to enter per day).        | D-8  |
|                                                                         | I would travel abroad if the leisure or sports (activities) available in my destination country was were managed in a sanitary way.                                             | D-9  |
|                                                                         | I will definitely travel abroad if the circumstances allow me to do so, regardless of the country's condition.                                                                  | D-10 |
| Social atmosphere related to overseas travel (S)                        | I would travel abroad if social perception regarding overseas travel improves to a point better than it is currently.                                                           | S-1  |
|                                                                         | I would travel abroad if social perception regarding overseas travel recovers to the pre-COVID-19 level.                                                                        | S-2  |
|                                                                         | If people around me are traveling abroad, I will also travel abroad.                                                                                                            | S-3  |
|                                                                         | I would travel abroad if there was no fear regarding contracting (transmitting) COVID-19 due to overseas travel.                                                                | S-4  |
|                                                                         | I would travel abroad if the government did not restrict overseas travel.                                                                                                       | S-5  |
|                                                                         | I would travel abroad if the World Health Organization (WHO) said it was okay to travel abroad.                                                                                 | S-6  |
|                                                                         | I will definitely travel abroad if the circumstances allow me to do so, regardless of the perceptions of the people around me.                                                  | S-7  |
| Level of aircraft/airport management related to infectious diseases (A) | I would travel abroad by air if the airline seats remain distanced from each other (1 m or more).                                                                               | A-1  |
|                                                                         | I would travel abroad by air if sufficient management is carried out regarding preventive measures, such as restricting the number of flights per day.                          | A-2  |
|                                                                         | I would travel abroad by air if the sanitary conditions (provision of hand sanitizer and other disinfection measures) within the aircraft improve.                              | A-3  |
|                                                                         | I would travel abroad again by air if aircraft were equipped with apparatuses to prevent transmission of disease through the air or via droplets, such as seat partitions, etc. | A-4  |
|                                                                         | I would travel abroad by air if all airport employees and cabin crew wore face masks.                                                                                           | A-5  |
|                                                                         | I would travel abroad by air if preventive measures were regularly carried out in all airport facilities.                                                                       | A-6  |
|                                                                         | I would travel abroad by air if COVID-19 testing was conducted on all passengers upon departure or entry.                                                                       | A-7  |
|                                                                         | I would travel abroad by air if direct flights were available for me to travel to my destination.                                                                               | A-8  |
|                                                                         | Even if a layover is needed to arrive at my destination, I would travel abroad by air if I only have to stay inside the airport.                                                | A-9  |
|                                                                         | I will definitely travel abroad if the circumstances allow me to do so, regardless of the aircraft/airport circumstances.                                                       | A-10 |
|                                                                         | I would travel abroad by air if I don't have to wear a face mask inside the aircraft (if I can breathe freely).                                                                 | A-11 |
|                                                                         | I would travel abroad by air if a distance (1 m or more) is maintained between people for check-in, security check, and boarding.                                               | A-12 |

### Survey Results.

**Table S2.** Survey results for COVID-19-related factors (C).

|      | Number of Samples        | All | Gender     |        | Age Group     |            |            |            | Aged 60 or Over |
|------|--------------------------|-----|------------|--------|---------------|------------|------------|------------|-----------------|
|      |                          |     | Male       | Female | Aged 20–29    | Aged 30–39 | Aged 40–49 | Aged 50–59 |                 |
|      |                          | 840 | 434        | 406    | 133           | 136        | 162        | 191        | 218             |
| C-1  | Mean                     | 3.6 | 3.7        | 3.6    | 3.9           | 3.7        | 3.8        | 3.6        | 3.5             |
|      | Statistical significance | -   | t = 1.421  |        | F = 4.345 **  |            |            |            |                 |
| C-2  | Mean                     | 3.8 | 3.8        | 3.8    | 4.1           | 3.8        | 3.8        | 3.8        | 3.7             |
|      | Statistical significance | -   | t = -0.601 |        | F = 2.613 *   |            |            |            |                 |
| C-3  | Mean                     | 3   | 3          | 3.1    | 3.1           | 3.4        | 3          | 2.8        | 3               |
|      | Statistical significance | -   | t = -0.866 |        | F = 4.720 *** |            |            |            |                 |
| C-4  | Mean                     | 2.4 | 2.4        | 2.3    | 2.5           | 2.8        | 2.3        | 2.1        | 2.3             |
|      | Statistical significance | -   | t = 1.119  |        | F = 6.686 *** |            |            |            |                 |
| C-5  | Mean                     | 2.7 | 2.7        | 2.6    | 2.7           | 2.9        | 2.6        | 2.6        | 2.6             |
|      | Statistical significance | -   | t = 1.022  |        | F = 1.962     |            |            |            |                 |
| C-6  | Mean                     | 3.3 | 3.3        | 3.2    | 3.4           | 3.3        | 3.1        | 3.2        | 3.3             |
|      | Statistical significance | -   | t = 0.525  |        | F = 1.033     |            |            |            |                 |
| C-7  | Mean                     | 3.4 | 3.4        | 3.4    | 3.7           | 3.6        | 3.3        | 3.3        | 3.3             |
|      | Statistical significance | -   | t = -0.047 |        | F = 3.487 **  |            |            |            |                 |
| C-8  | Mean                     | 4.1 | 4.1        | 4.2    | 4.2           | 4.1        | 4          | 4.2        | 4.2             |
|      | Statistical significance | -   | t = -0.803 |        | F = 1.644     |            |            |            |                 |
| C-9  | Mean                     | 3.1 | 3.1        | 3.1    | 3.2           | 3.3        | 2.9        | 3          | 3.2             |
|      | Statistical significance | -   | t = 0.604  |        | F = 1.804     |            |            |            |                 |
| C-10 | Mean                     | 2.3 | 2.3        | 2.3    | 2.5           | 2.7        | 2.3        | 2.1        | 2.1             |
|      | Statistical significance | -   | t = 0.200  |        | F = 4.515 **  |            |            |            |                 |

\*  $p < 0.1$ ; \*\*  $p < 0.05$ ; \*\*\*  $p < 0.001$  (two-tailed).

**Table S3.** Survey results for destination factors (Q).

| Number of Samples |                          | All | Gender     |        | Age Group     |       |       |       |                 |
|-------------------|--------------------------|-----|------------|--------|---------------|-------|-------|-------|-----------------|
|                   |                          |     | Male       | Female | Aged          | Aged  | Aged  | Aged  | Aged 60 or Over |
|                   |                          |     |            |        | 20–29         | 30–39 | 40–49 | 50–59 |                 |
|                   |                          | 840 | 434        | 406    | 133           | 136   | 162   | 191   | 218             |
| Q-1               | Mean                     | 2.2 | 2.3        | 2.2    | 2.6           | 2.4   | 2.3   | 2     | 2.1             |
|                   | Statistical significance | -   | t = 1.419  |        | F = 6.875 *** |       |       |       |                 |
| Q-2               | Mean                     | 2.2 | 2.2        | 2.2    | 2.3           | 2.5   | 2.2   | 2.1   | 2.2             |
|                   | Statistical significance | -   | t = 0.542  |        | F = 2.631 *   |       |       |       |                 |
| Q-3               | Mean                     | 2.4 | 2.4        | 2.4    | 2.5           | 2.7   | 2.4   | 2.1   | 2.3             |
|                   | Statistical significance | -   | t = 0.078  |        | F = 5.759 *** |       |       |       |                 |
| Q-4               | Mean                     | 3.6 | 3.6        | 3.6    | 3.7           | 3.7   | 3.5   | 3.6   | 3.6             |
|                   | Statistical significance | -   | t = 0.391  |        | F = 0.435     |       |       |       |                 |
| Q-5               | Mean                     | 2.2 | 2.2        | 2.3    | 2.4           | 2.5   | 2.3   | 2.1   | 2.1             |
|                   | Statistical significance | -   | t = -1.740 |        | F = 3.458 **  |       |       |       |                 |

\*  $p < 0.1$ ; \*\*  $p < 0.05$ ; \*\*\*  $p < 0.001$  (two-tailed).

**Table S4.** Survey results for destination factors (D).

| Number of Samples |                          | Gender |              |        | Age Group  |                |            |            | Aged 60 or Over |
|-------------------|--------------------------|--------|--------------|--------|------------|----------------|------------|------------|-----------------|
|                   |                          | All    | Male         | Female | Aged 20–29 | Aged 30–39     | Aged 40–49 | Aged 50–59 |                 |
|                   |                          | 840    | 434          | 406    | 133        | 136            | 162        | 191        | 218             |
| D-1               | Mean                     | 3.9    | 3.9          | 3.8    | 4.1        | 3.9            | 3.9        | 3.8        | 3.7             |
|                   | Statistical significance | -      | t = 0.184    |        |            | F = 4.873 ***  |            |            |                 |
| D-2               | Mean                     | 3.8    | 3.8          | 3.8    | 4.1        | 3.8            | 3.8        | 3.8        | 3.6             |
|                   | Statistical significance | -      | t = 0.042    |        |            | F = 3.772 **   |            |            |                 |
| D-3               | Mean                     | 3.8    | 3.8          | 3.8    | 4          | 3.9            | 3.9        | 3.8        | 3.6             |
|                   | Statistical significance | -      | t = -0.574   |        |            | F = 3.386 **   |            |            |                 |
| D-4               | Mean                     | 3.8    | 3.8          | 3.8    | 4.1        | 3.8            | 3.8        | 3.7        | 3.6             |
|                   | Statistical significance | -      | t = 0.192    |        |            | F = 5.067 ***  |            |            |                 |
| D-5               | Mean                     | 2.8    | 2.7          | 2.8    | 3.2        | 3              | 2.8        | 2.5        | 2.6             |
|                   | Statistical significance | -      | t = -0.726   |        |            | F = 10.981 *** |            |            |                 |
| D-6               | Mean                     | 2.6    | 2.6          | 2.6    | 3.1        | 2.8            | 2.6        | 2.4        | 2.4             |
|                   | Statistical significance | -      | t = 0.687    |        |            | F = 10.851 *** |            |            |                 |
| D-7               | Mean                     | 3.6    | 3.5          | 3.7    | 3.8        | 3.7            | 3.5        | 3.6        | 3.6             |
|                   | Statistical significance | -      | t = -2.255 * |        |            | F = 1.857      |            |            |                 |
| D-8               | Mean                     | 3      | 3            | 3.1    | 3.5        | 3.1            | 3          | 2.8        | 2.9             |
|                   | Statistical significance | -      | t = -0.618   |        |            | F = 7.55 ***   |            |            |                 |
| D-9               | Mean                     | 3.4    | 3.4          | 3.4    | 3.9        | 3.6            | 3.4        | 3.1        | 3.2             |
|                   | Statistical significance | -      | t = 0.451    |        |            | F = 11.59 ***  |            |            |                 |
| D-10              | Mean                     | 2.5    | 2.6          | 2.4    | 2.9        | 2.8            | 2.5        | 2.3        | 2.2             |
|                   | Statistical significance | -      | t = 1.919    |        |            | F = 9.223 ***  |            |            |                 |

\*  $p < 0.1$ ; \*\*  $p < 0.05$ ; \*\*\*  $p < 0.001$  (two-tailed).

**Table S5.** Survey results for social atmosphere related to overseas travel (S).

| Number of Samples |                          | Gender |            |        | Age Group  |               |            |            | Aged 60 or Over |
|-------------------|--------------------------|--------|------------|--------|------------|---------------|------------|------------|-----------------|
|                   |                          | All    | Male       | Female | Aged 20–29 | Aged 30–39    | Aged 40–49 | Aged 50–59 |                 |
|                   |                          | 840    | 434        | 406    | 133        | 136           | 162        | 191        | 218             |
| S-1               | Mean                     | 3.5    | 3.5        | 3.5    | 3.8        | 3.6           | 3.5        | 3.3        | 3.3             |
|                   | Statistical significance | -      | t = 0.46   |        |            | F = 6.937 *** |            |            |                 |
| S-2               | Mean                     | 3.9    | 3.9        | 4      | 4          | 4             | 3.8        | 4          | 3.9             |
|                   | Statistical significance | -      | t = -1.479 |        |            | F = 1.835     |            |            |                 |
| S-3               | Mean                     | 3      | 3          | 3      | 3.3        | 3.1           | 3          | 3          | 2.8             |
|                   | Statistical significance | -      | t = 0.548  |        |            | F = 2.805 *   |            |            |                 |
| S-4               | Mean                     | 4.1    | 4          | 4.2    | 4.2        | 3.9           | 4.1        | 4.1        | 4.2             |
|                   | Statistical significance | -      | t = -1.913 |        |            | F = 1.892     |            |            |                 |
| S-5               | Mean                     | 3.2    | 3.1        | 3.3    | 3.5        | 3.2           | 3.1        | 3.1        | 3.1             |
|                   | Statistical significance | -      | t = -1.227 |        |            | F = 2.675 *   |            |            |                 |
| S-6               | Mean                     | 3.5    | 3.5        | 3.6    | 3.6        | 3.6           | 3.5        | 3.5        | 3.6             |
|                   | Statistical significance | -      | t = -1.186 |        |            | F = 0.152     |            |            |                 |
| S-7               | Mean                     | 2.4    | 2.4        | 2.4    | 2.6        | 2.5           | 2.4        | 2.3        | 2.2             |
|                   | Statistical significance | -      | t = 0.579  |        |            | F = 2.668 *   |            |            |                 |

\*  $p < 0.1$ ; \*\*  $p < 0.05$ ; \*\*\*  $p < 0.001$  (two-tailed).

**Table S6.** Survey results for level of aircraft/airport management related to infectious diseases (A).

| Number of Samples |                          | Gender |            |        | Age Group  |                |            |            | Aged 60 or Over |
|-------------------|--------------------------|--------|------------|--------|------------|----------------|------------|------------|-----------------|
|                   |                          | All    | Male       | Female | Aged 20–29 | Aged 30–39     | Aged 40–49 | Aged 50–59 |                 |
|                   |                          | 840    | 434        | 406    | 133        | 136            | 162        | 191        | 218             |
| A-1               | Mean                     | 3      | 3          | 3      | 3.3        | 3.2            | 3.2        | 2.8        | 2.9             |
|                   | Statistical significance | -      | t = 0.736  |        |            | F = 6.372 ***  |            |            |                 |
| A-2               | Mean                     | 3.1    | 3.1        | 3      | 3.4        | 3.2            | 3.2        | 2.9        | 3               |
|                   | Statistical significance | -      | t = 1.106  |        |            | F = 4.602 **   |            |            |                 |
| A-3               | Mean                     | 3.1    | 3.1        | 3      | 3.3        | 3.2            | 3.2        | 2.8        | 3               |
|                   | Statistical significance | -      | t = 1.068  |        |            | F = 4.124 **   |            |            |                 |
| A-4               | Mean                     | 3.2    | 3.2        | 3.2    | 3.5        | 3.3            | 3.3        | 2.9        | 3.1             |
|                   | Statistical significance | -      | t = 0.773  |        |            | F = 5.880 ***  |            |            |                 |
| A-5               | Mean                     | 3      | 3          | 3      | 3.4        | 3.2            | 3.1        | 2.7        | 2.8             |
|                   | Statistical significance | -      | t = 0.674  |        |            | F = 10.182 *** |            |            |                 |
| A-6               | Mean                     | 3.2    | 3.2        | 3.2    | 3.5        | 3.3            | 3.3        | 3          | 3.1             |
|                   | Statistical significance | -      | t = 0.115  |        |            | F = 5.27 ***   |            |            |                 |
| A-7               | Mean                     | 3.1    | 3.1        | 3.1    | 3.6        | 3.3            | 3.1        | 2.8        | 2.9             |
|                   | Statistical significance | -      | t = -0.112 |        |            | F = 9.06 ***   |            |            |                 |
| A-8               | Mean                     | 3.2    | 3.2        | 3.2    | 3.5        | 3.3            | 3.2        | 2.9        | 3.2             |
|                   | Statistical significance | -      | t = -0.529 |        |            | F = 5.384 ***  |            |            |                 |
| A-9               | Mean                     | 2.8    | 2.8        | 2.7    | 3          | 3              | 2.8        | 2.5        | 2.6             |
|                   | Statistical significance | -      | t = 1.594  |        |            | F = 5.723 ***  |            |            |                 |
| A-10              | Mean                     | 2.4    | 2.5        | 2.4    | 2.8        | 2.7            | 2.4        | 2.3        | 2.2             |
|                   | Statistical significance | -      | t = 1.587  |        |            | F = 5.866 ***  |            |            |                 |
| A-11              | Mean                     | 3.4    | 3.4        | 3.4    | 3.7        | 3.4            | 3.3        | 3.2        | 3.3             |
|                   | Statistical significance | -      | t = -0.126 |        |            | F = 3.559 **   |            |            |                 |
| A-12              | Mean                     | 2.9    | 2.9        | 2.9    | 3.4        | 3              | 3          | 2.6        | 2.8             |
|                   | Statistical significance | -      | t = -0.283 |        |            | F = 10.283 *** |            |            |                 |
| A-13              | Mean                     | 2.9    | 3          | 2.9    | 3.5        | 3.1            | 3.1        | 2.6        | 2.7             |
|                   | Statistical significance | -      | t = 1.366  |        |            | F = 12.02 ***  |            |            |                 |

\*  $p < 0.1$ ; \*\*  $p < 0.05$ ; \*\*\*  $p < 0.001$  (two-tailed).**Table S7.** Survey results for respondent properties.

| Respondent Properties |                 | Number of Samples | Composition Ratio (%) |
|-----------------------|-----------------|-------------------|-----------------------|
| Total                 |                 | 840               | 100.0                 |
| Gender                | Male            | 434               | 51.5                  |
|                       | Female          | 406               | 48.5                  |
| Age Group             | Aged 20–29      | 133               | 15.5                  |
|                       | Aged 30–39      | 136               | 15.6                  |
|                       | Aged 40–49      | 162               | 19.4                  |
|                       | Aged 50–59      | 191               | 21.6                  |
|                       | Aged 60 or Over | 218               | 28.0                  |
| Region                | Seoul           | 158               | 19.5                  |
|                       | Busan           | 58                | 7.1                   |
|                       | Daegu           | 34                | 4.2                   |
|                       | Incheon         | 50                | 6.2                   |
|                       | Gwangju         | 24                | 2.9                   |
|                       | Daejeon         | 22                | 2.7                   |
|                       | Ulsan           | 15                | 1.8                   |

|     |                              |     |      |
|-----|------------------------------|-----|------|
| Job | Gyeong-gi                    | 196 | 24.1 |
|     | Gang-won                     | 24  | 3.0  |
|     | Chung-buk                    | 22  | 2.6  |
|     | Chung-nam                    | 30  | 3.7  |
|     | Sejong                       | 19  | 0.5  |
|     | Jeon-buk                     | 33  | 4.1  |
|     | Jeon-nam                     | 33  | 4.0  |
|     | Gyeong-buk                   | 42  | 5.1  |
|     | Gyeong-nam                   | 59  | 7.2  |
|     | Jeju                         | 21  | 1.2  |
|     | Managerial Position          | 91  | 10.8 |
|     | Expert and associated worker | 125 | 14.2 |
|     | Office worker                | 252 | 30.4 |
|     | Service personnel            | 98  | 11.5 |
|     | Salesperson                  | 36  | 4.2  |
|     | Labor worker                 | 31  | 3.8  |
|     | Standing army                | 3   | 0.4  |
|     | Housewife                    | 117 | 14.3 |
|     | Student                      | 23  | 2.7  |
|     | the other unemployed         | 44  | 5.2  |
|     | Et cetera                    | 20  | 2.5  |

#### Model building results.

Note: Since 1 is not included in the range of correlation coefficients between all factors, it could be said that the validity of determination has been obtained.

**Table S8.** Verified the validity of determination using correlation coefficients and standard errors.

| Category                              |      |                                       | Estimate | S.E.  | S. E. <sup>2</sup> | -     | +     |
|---------------------------------------|------|---------------------------------------|----------|-------|--------------------|-------|-------|
| Level of COVID-19                     | <--> | Self-isolation period upon entry      | 0.764    | 0.030 | 0.060              | 0.704 | 0.824 |
| Level of COVID-19                     | <--> | Circumstances of overseas destination | 0.283    | 0.019 | 0.038              | 0.245 | 0.321 |
| Level of COVID-19                     | <--> | Social atmosphere                     | 0.729    | 0.028 | 0.056              | 0.673 | 0.785 |
| Level of COVID-19                     | <--> | Level of aircraft/airport management  | 0.592    | 0.027 | 0.054              | 0.538 | 0.646 |
| Self-isolation period upon entry      | <--> | Circumstances of overseas destination | 0.162    | 0.018 | 0.036              | 0.126 | 0.198 |
| Self-isolation period upon entry      | <--> | Social atmosphere                     | 0.656    | 0.027 | 0.054              | 0.602 | 0.710 |
| Self-isolation period upon entry      | <--> | Level of aircraft/airport management  | 0.561    | 0.026 | 0.052              | 0.509 | 0.613 |
| Circumstances of overseas destination | <--> | Social atmosphere                     | 0.496    | 0.020 | 0.040              | 0.456 | 0.536 |
| Circumstances of overseas destination | <--> | Level of aircraft/airport management  | 0.479    | 0.021 | 0.042              | 0.437 | 0.521 |
| Social atmosphere                     | <--> | Level of aircraft/airport management  | 0.720    | 0.028 | 0.056              | 0.664 | 0.776 |

**Table S9.** Correspondence sample test (*t*-test) results between individual questions of two surveys.

| Questionnaire Question |            | Average | Standard Deviation | Standard Error Average | 95% Confidence Interval |             | t      | df  | Significance Level |
|------------------------|------------|---------|--------------------|------------------------|-------------------------|-------------|--------|-----|--------------------|
|                        |            |         |                    |                        | Lower Limit             | Upper limit |        |     |                    |
| C-1 (1st)              | C-1 (2nd)  | 0.4071  | 1.2726             | 0.0439                 | 0.321                   | 0.4933      | 9.272  | 839 | 0                  |
| C-2 (1st)              | C-2 (2nd)  | 0.2679  | 1.2537             | 0.0433                 | 0.183                   | 0.3528      | 6.192  | 839 | 0                  |
| C-3 (1st)              | C-3 (2nd)  | -0.1857 | 1.4113             | 0.0487                 | -0.2813                 | -0.0901     | -3.814 | 839 | 0                  |
| C-4 (1st)              | C-4 (2nd)  | -0.2917 | 1.3271             | 0.0458                 | -0.3815                 | -0.2018     | -6.37  | 839 | 0                  |
| C-5 (1st)              | C-5 (2nd)  | -0.3952 | 1.3543             | 0.0467                 | -0.487                  | -0.3035     | -8.458 | 839 | 0                  |
| C-6 (1st)              | C-6 (2nd)  | -0.4714 | 1.5421             | 0.0532                 | -0.5759                 | -0.367      | -8.86  | 839 | 0                  |
| C-7 (1st)              | C-7 (2nd)  | -0.3071 | 1.6211             | 0.0559                 | -0.4169                 | -0.1974     | -5.491 | 839 | 0                  |
| C-8 (1st)              | C-8 (2nd)  | -0.3119 | 1.3426             | 0.0463                 | -0.4028                 | -0.221      | -6.733 | 839 | 0                  |
| C-9 (1st)              | C-9 (2nd)  | -0.225  | 1.4939             | 0.0515                 | -0.3262                 | -0.1238     | -4.365 | 839 | 0                  |
| C-10 (1st)             | C-10 (2nd) | -0.1369 | 1.453              | 0.0501                 | -0.2353                 | -0.0385     | -2.731 | 839 | 0.006              |
| Q-1 (1st)              | Q-1 (2nd)  | -0.0881 | 1.2598             | 0.0435                 | -0.1734                 | -0.0028     | -2.027 | 839 | 0.043              |
| Q-2 (1st)              | Q-2 (2nd)  | -0.1607 | 1.2035             | 0.0415                 | -0.2422                 | -0.0792     | -3.87  | 839 | 0                  |
| Q-3 (1st)              | Q-3 (2nd)  | -0.2036 | 1.2705             | 0.0438                 | -0.2896                 | -0.1175     | -4.644 | 839 | 0                  |
| Q-4 (1st)              | Q-4 (2nd)  | -0.175  | 1.4029             | 0.0484                 | -0.27                   | -0.08       | -3.615 | 839 | 0                  |
| Q-5 (1st)              | Q-5 (2nd)  | -0.1155 | 1.4334             | 0.0495                 | -0.2125                 | -0.0184     | -2.335 | 839 | 0.02               |
| D-1 (1st)              | D-1 (2nd)  | -0.0976 | 1.1989             | 0.0414                 | -0.1788                 | -0.0164     | -2.36  | 839 | 0.019              |
| D-2 (1st)              | D-2 (2nd)  | -0.0464 | 1.269              | 0.0438                 | -0.1324                 | 0.0395      | -1.06  | 839 | 0.289              |
| D-3 (1st)              | D-3 (2nd)  | -0.1107 | 1.3077             | 0.0451                 | -0.1993                 | -0.0222     | -2.454 | 839 | 0.014              |
| D-4 (1st)              | D-4 (2nd)  | -0.0929 | 1.3141             | 0.0453                 | -0.1818                 | -0.0039     | -2.048 | 839 | 0.041              |
| D-5 (1st)              | D-5 (2nd)  | -0.2595 | 1.2961             | 0.0447                 | -0.3473                 | -0.1717     | -5.803 | 839 | 0                  |
| D-6 (1st)              | D-6 (2nd)  | -0.0369 | 1.3091             | 0.0452                 | -0.1256                 | 0.0518      | -0.817 | 839 | 0.414              |
| D-7 (1st)              | D-7 (2nd)  | -0.0833 | 1.3083             | 0.0451                 | -0.1719                 | 0.0053      | -1.846 | 839 | 0.065              |
| D-8 (1st)              | D-8 (2nd)  | -0.2    | 1.4518             | 0.0501                 | -0.2983                 | -0.1017     | -3.993 | 839 | 0                  |
| D-9 (1st)              | D-9 (2nd)  | -0.1167 | 1.427              | 0.0492                 | -0.2133                 | -0.02       | -2.369 | 839 | 0.018              |
| D-10 (1st)             | D-10 (2nd) | -0.1714 | 1.3995             | 0.0483                 | -0.2662                 | -0.0766     | -3.55  | 839 | 0                  |
| S-1 (1st)              | S-1 (2nd)  | -0.0464 | 1.2634             | 0.0436                 | -0.132                  | 0.0391      | -1.065 | 839 | 0.287              |
| S-2 (1st)              | S-2 (2nd)  | 0.0167  | 1.2136             | 0.0419                 | -0.0655                 | 0.0989      | 0.398  | 839 | 0.691              |
| S-3 (1st)              | S-3 (2nd)  | -0.169  | 1.3835             | 0.0477                 | -0.2627                 | -0.0754     | -3.541 | 839 | 0                  |
| S-4 (1st)              | S-4 (2nd)  | -0.1095 | 1.1491             | 0.0396                 | -0.1873                 | -0.0317     | -2.762 | 839 | 0.006              |
| S-5 (1st)              | S-5 (2nd)  | -0.2298 | 1.4162             | 0.0489                 | -0.3257                 | -0.1339     | -4.702 | 839 | 0                  |
| S-6 (1st)              | S-6 (2nd)  | -0.35   | 1.3866             | 0.0478                 | -0.4439                 | -0.2561     | -7.316 | 839 | 0                  |
| S-7 (1st)              | S-7 (2nd)  | -0.0798 | 1.3476             | 0.0465                 | -0.171                  | 0.0115      | -1.715 | 839 | 0.087              |
| A-1 (1st)              | A-1 (2nd)  | -0.0607 | 1.3869             | 0.0479                 | -0.1546                 | 0.0332      | -1.269 | 839 | 0.205              |
| A-2 (1st)              | A-2 (2nd)  | 0.0036  | 1.423              | 0.0491                 | -0.0928                 | 0.0999      | 0.073  | 839 | 0.942              |
| A-3 (1st)              | A-3 (2nd)  | -0.0512 | 1.4363             | 0.0496                 | -0.1485                 | 0.0461      | -1.033 | 839 | 0.302              |
| A-4 (1st)              | A-4 (2nd)  | -0.0071 | 1.4825             | 0.0512                 | -0.1075                 | 0.0933      | -0.14  | 839 | 0.889              |
| A-5 (1st)              | A-5 (2nd)  | -0.0619 | 1.4154             | 0.0488                 | -0.1578                 | 0.0339      | -1.268 | 839 | 0.205              |
| A-6 (1st)              | A-6 (2nd)  | -0.044  | 1.4604             | 0.0504                 | -0.1429                 | 0.0549      | -0.874 | 839 | 0.382              |
| A-7 (1st)              | A-7 (2nd)  | -0.0202 | 1.4544             | 0.0502                 | -0.1187                 | 0.0783      | -0.403 | 839 | 0.687              |
| A-8 (1st)              | A-8 (2nd)  | -0.006  | 1.4545             | 0.0502                 | -0.1045                 | 0.0926      | -0.119 | 839 | 0.906              |
| A-9 (1st)              | A-9 (2nd)  | -0.0893 | 1.4689             | 0.0507                 | -0.1888                 | 0.0102      | -1.762 | 839 | 0.078              |
| A-10 (1st)             | A-10 (2nd) | -0.0833 | 1.4443             | 0.0498                 | -0.1811                 | 0.0145      | -1.672 | 839 | 0.095              |
| A-11 (1st)             | A-11 (2nd) | -0.3798 | 1.5661             | 0.054                  | -0.4858                 | -0.2737     | -7.028 | 839 | 0                  |
| A-12 (1st)             | A-12 (2nd) | -0.0179 | 1.3976             | 0.0482                 | -0.1125                 | 0.0768      | -0.37  | 839 | 0.711              |
| A-13 (1st)             | A-13 (2nd) | -0.1286 | 1.4277             | 0.0493                 | -0.2253                 | -0.0319     | -2.61  | 839 | 0.009              |

**Table S10.** Results of multi-group analysis between questionnaire surveys (final model).

| Factor                                                                                        | 1st Survey                          |            | 2nd Survey                          |            |
|-----------------------------------------------------------------------------------------------|-------------------------------------|------------|-------------------------------------|------------|
|                                                                                               | Estimate (Standardized Coefficient) | C.R.       | Estimate (Standardized Coefficient) | C.R.       |
| COVID-19-related factor (C) --> Factor related to self-isolation upon entry and departure (Q) | 0.776                               | 19.158 *** | 0.747                               | 14.577 *** |
| lated factor (C) --> Destination-related factor (D)                                           | 0.362                               | 6.033 ***  | 0.408                               | 5.853 ***  |
| COVID-19-related factor (C) --> Social atmosphere related to overseas travel (S)              | 0.413                               | 7.712 ***  | 0.434                               | 6.909 ***  |

|                                                                                                                                           |        |            |        |               |
|-------------------------------------------------------------------------------------------------------------------------------------------|--------|------------|--------|---------------|
| COVID-19-related factor (C) --> Level of aircraft/airport management related to infectious diseases (A)                                   | 0.100  | 2.020 **   | 0.063  | 0.997 (0.319) |
| Factor related to self-isolation upon entry and departure (Q) --> Destination-related factor (D)                                          | -0.128 | -2.183 **  | -0.134 | -2.012 **     |
| Factor related to self-isolation upon entry and departure (Q) --> Social atmosphere related to overseas travel (S)                        | 0.271  | 5.435 ***  | 0.290  | 5.094 ***     |
| Factor related to self-isolation upon entry and departure (Q) --> Level of aircraft/airport management related to infectious diseases (A) | 0.116  | 2.598 **   | 0.252  | 4.594 ***     |
| Destination-related factor (D) --> Social atmosphere related to overseas travel (S)                                                       | 0.331  | 10.968 *** | 0.339  | 8.921 ***     |
| Destination-related factor (D) --> Level of aircraft/airport management related to infectious diseases (A)                                | 0.240  | 7.984 ***  | 0.145  | 3.593 ***     |
| Social atmosphere related to overseas travel (S) --> Level of aircraft/airport management related to infectious diseases (A)              | 0.467  | 8.646 ***  | 0.422  | 5.349 ***     |

\*  $p < 0.1$ ; \*\*  $p < 0.05$ ; \*\*\*  $p < 0.001$  (two-tailed)
